# Supplementary material for: The comprehensive immunomodulation of NeurimmiRs in haemocytes of oyster Crassostrea gigas after acetylcholine and norepinephrine stimulation
Source: PubMed Central journal article supplement (PMC4650145; doi:10.1186/s12864-015-2150-8), 2015-11-14

Sequence Length Distribution

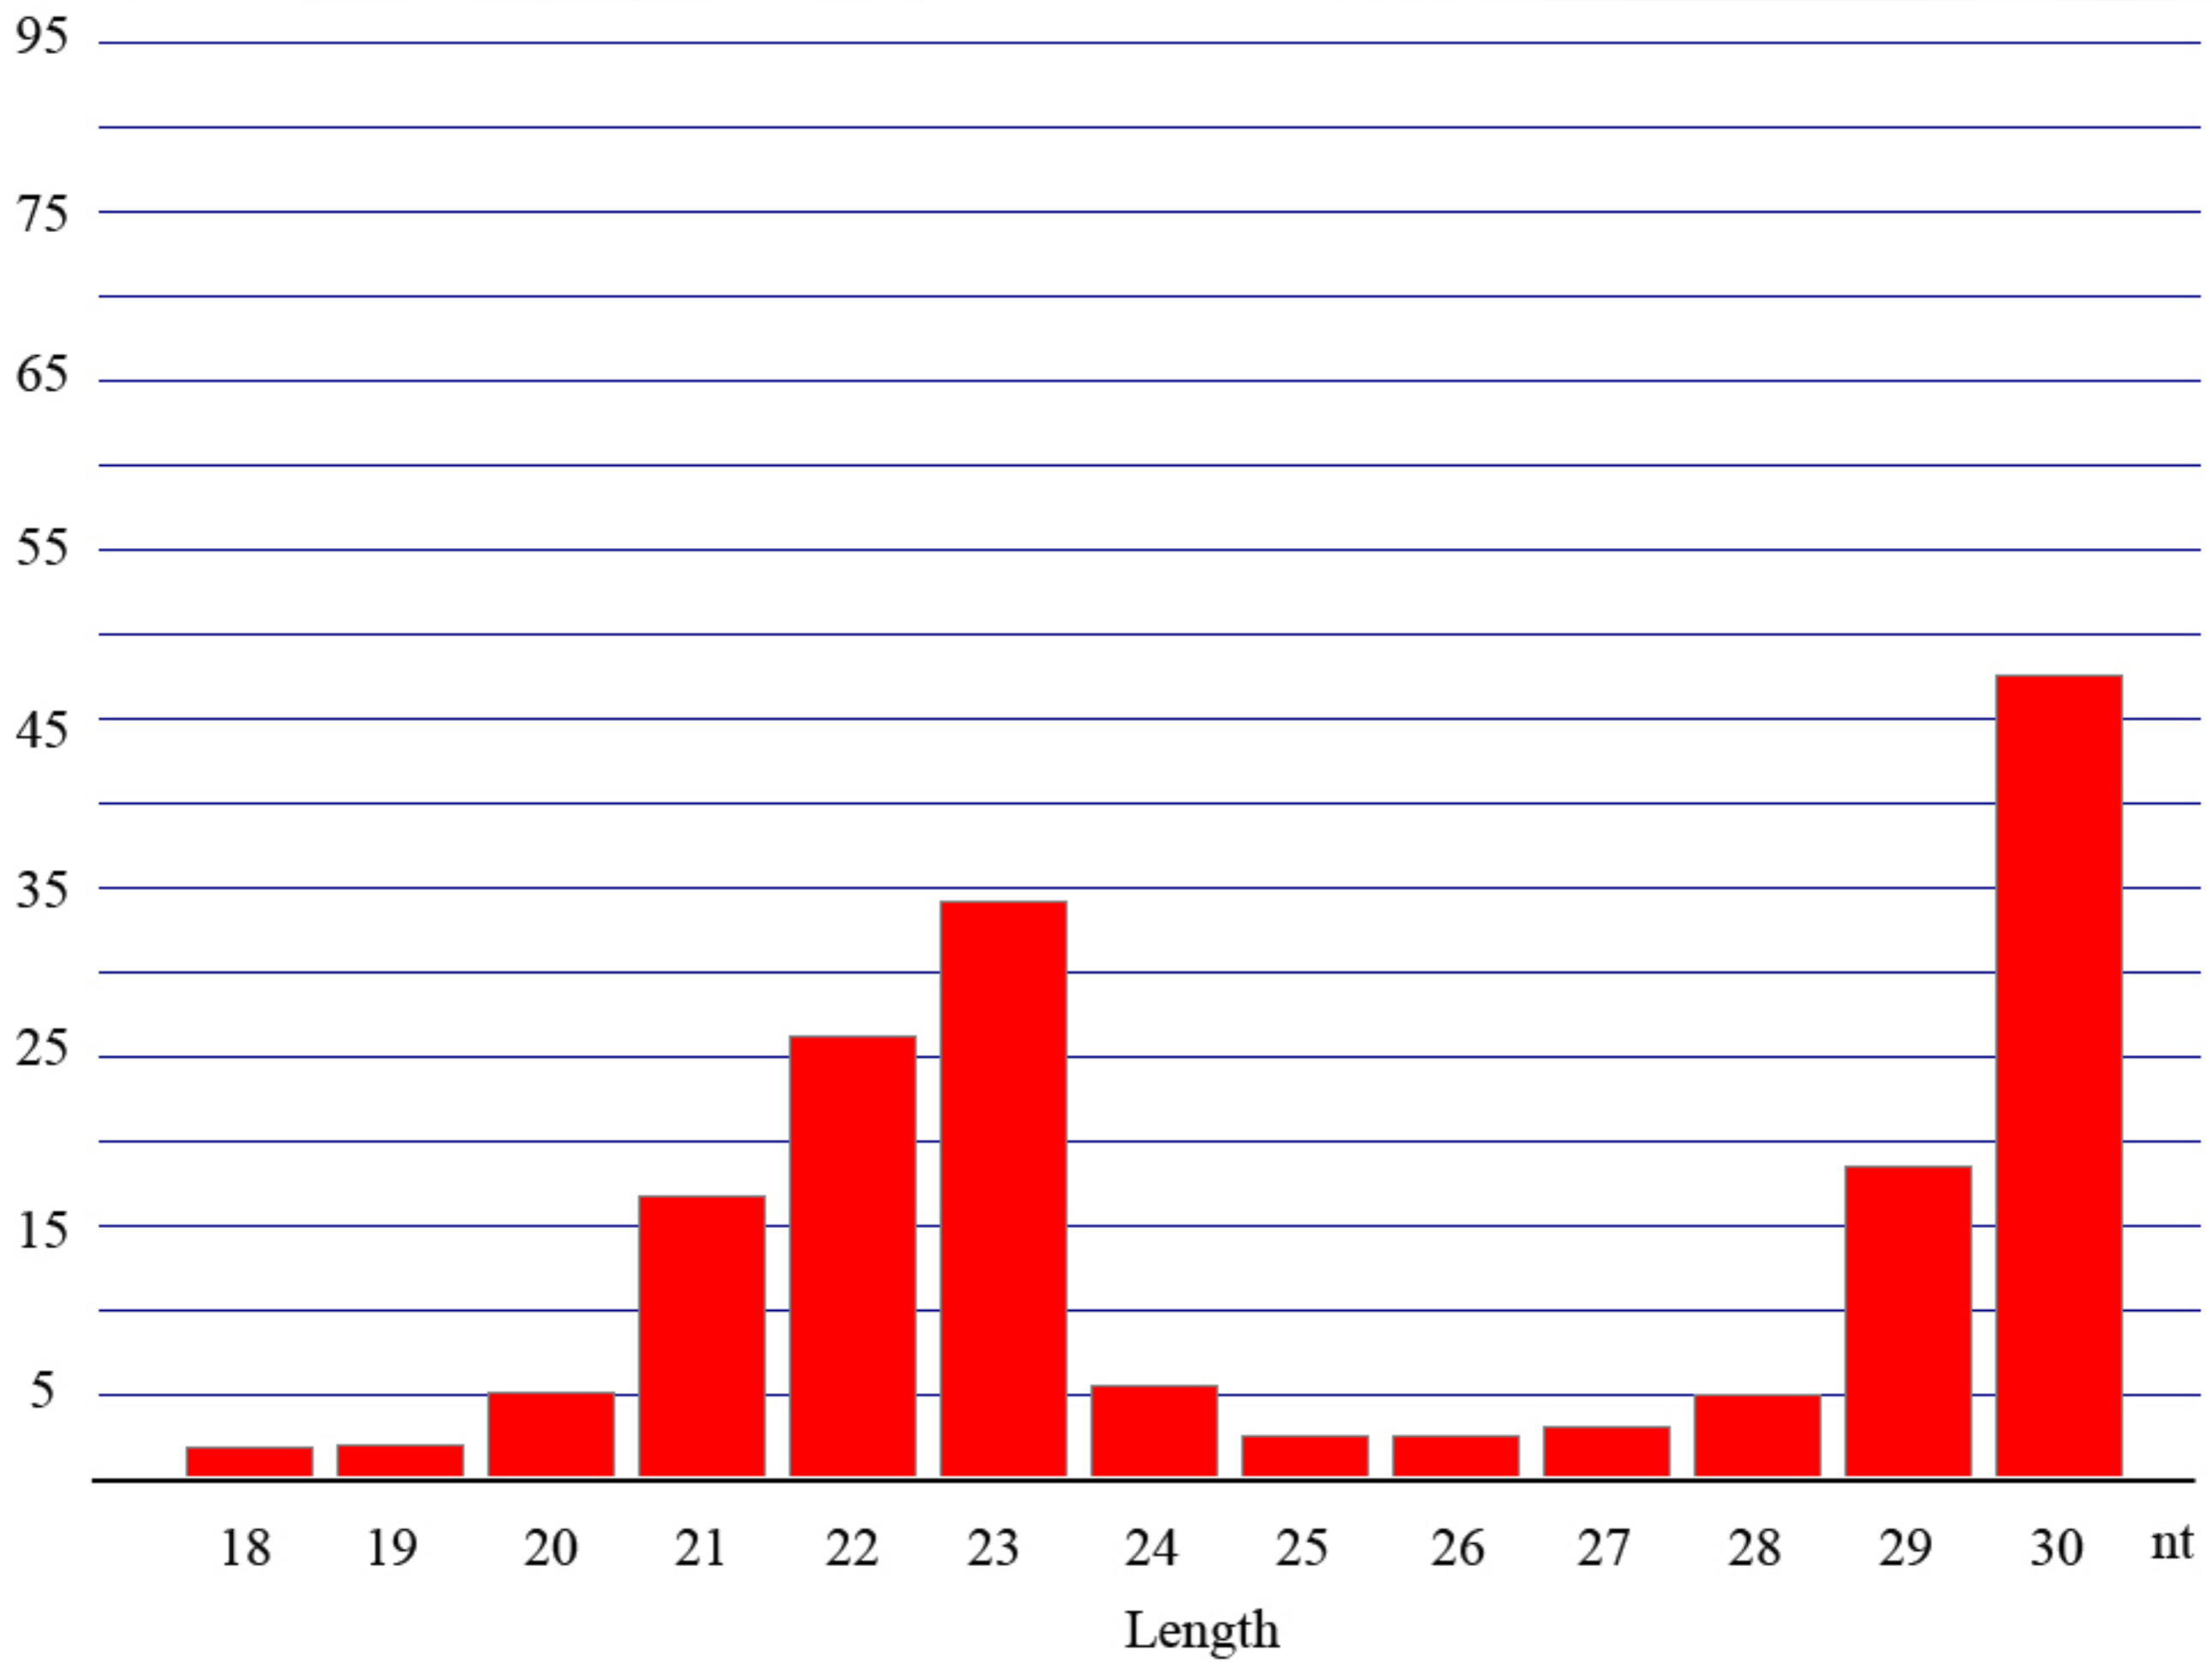

Supplement: 12864_2015_2150_MOESM2_ESM.pdf [file 12864_2015_2150_MOESM2_ESM.pdf]
